# Supplementary material for: Cell Analysis from Dried Blood Spots: New Opportunities in Immunology, Hematology, and Infectious Diseases
Source: PubMed Central journal article supplement (PMC8456206; doi:10.1002/advs.202100323), 2021-07-18
Supplement: ADVS-8-2100323-s001.pdf [file ADVS-8-2100323-s001.pdf]

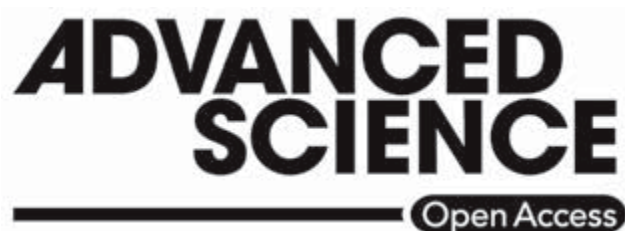

## Supporting Information

for *Adv. Sci.*, DOI: 10.1002/adv.202100323

Cell analysis from dried blood spots: New opportunities in immunology, hematology and infectious diseases

*Ines AIT BELKACEM, Noushine MOSSADEGH-KELLER, Pénélope BOURGOIN, Isabelle ARNOUX, Marie LOOSVELD, Pierre-Emmanuel MORANGE, Thibaut MARKARIAN, Pierre MICHELET, Jean Marc BUSNEL, Sandrine ROULLAND, Franck GALLAND, and Fabrice MALERGUE\**

**SUPPLEMENTARY FIGURES.**

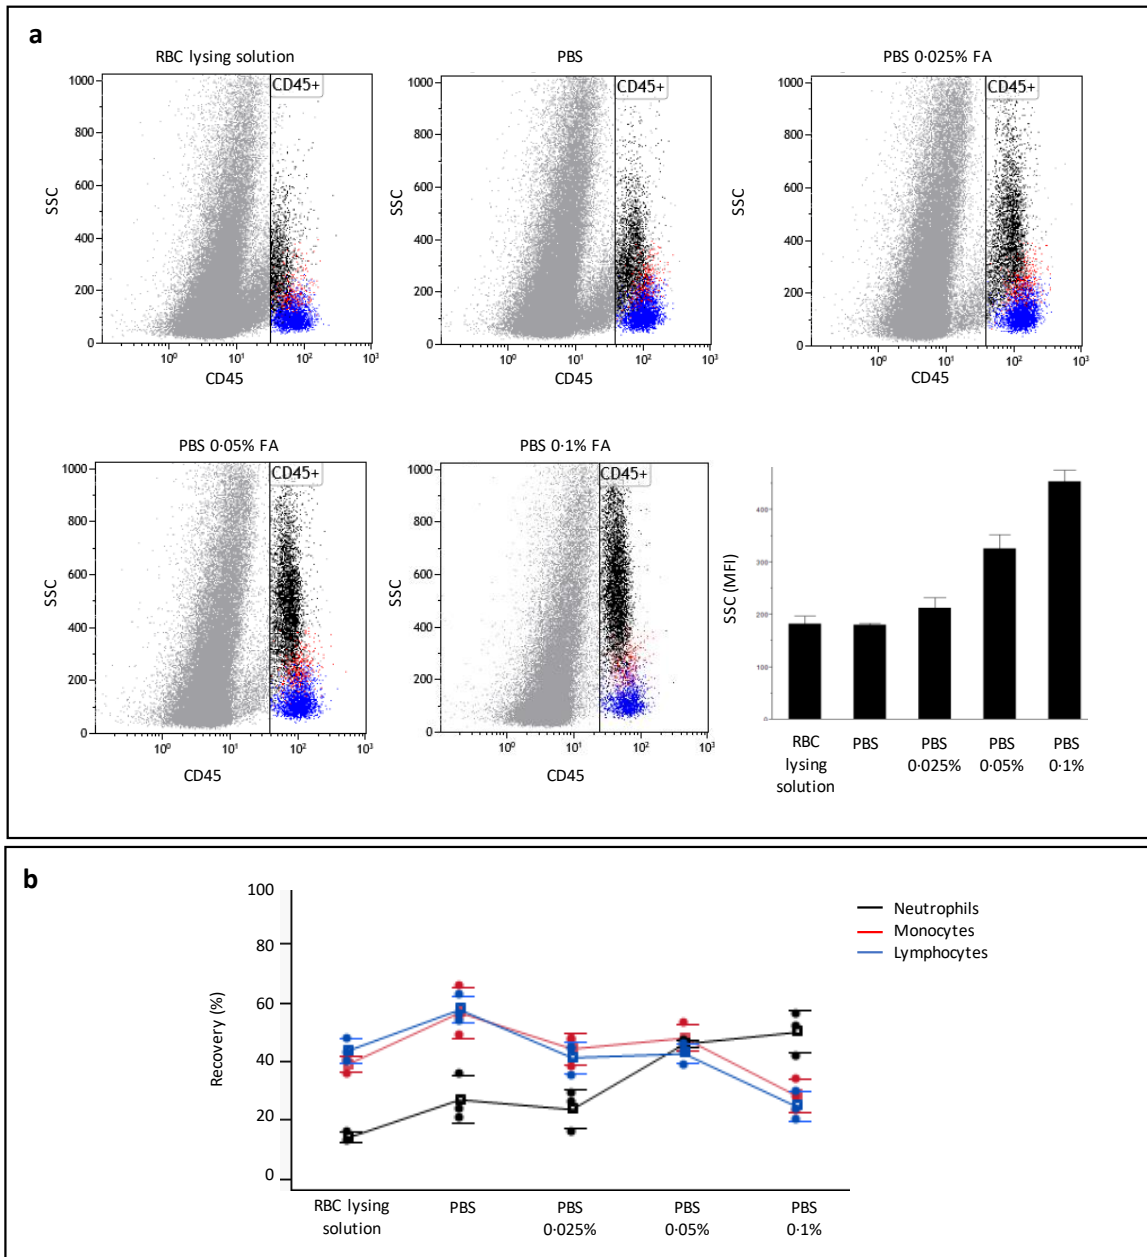

**Supplementary Figure 1.** Low-concentration formaldehyde improves leucocyte structure. (a) Cytometry dot plots and SSC recording on leucocytes eluted from solid support with different elution buffers: RBC lysing solution, PBS 1X, PBS 1X 0,025% FA, PBS 1X 0,05%FA and PBS 1X 0,1%FA, n=3 per condition, and (b) corresponding leucocyte subpopulation recovery. All data are presented as mean  $\pm$  standard deviation.

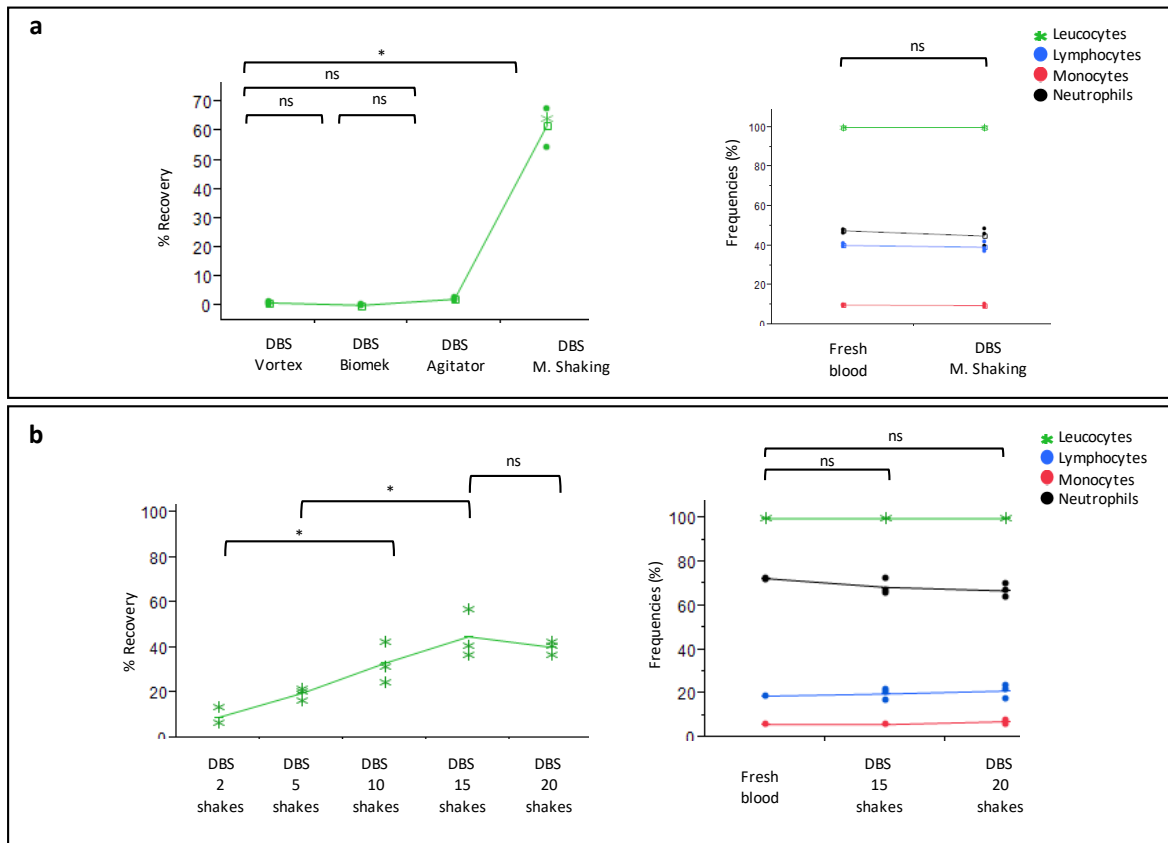

**Supplementary Figure 2.** Comparing leucocyte recovery with different elution methods. **(a)** Leucocyte recovery and frequencies when eluting cells with vortex, automated orbital shaker, rotating mixer (agitator) and strong manual shaking. **(b)** Leucocyte recovery and frequencies when eluting cells with an increasing number of manual shakes. ns: non-significant ( $p$  values  $> 0,05$ ); \*: significant ( $p$  values  $\leq 0,05$ ), on Tukey-Kramer HSD (for leucocyte recovery) and Dunnett's test (for subset frequencies),  $n=3$  per condition. All data are presented as mean  $\pm$  standard deviation.

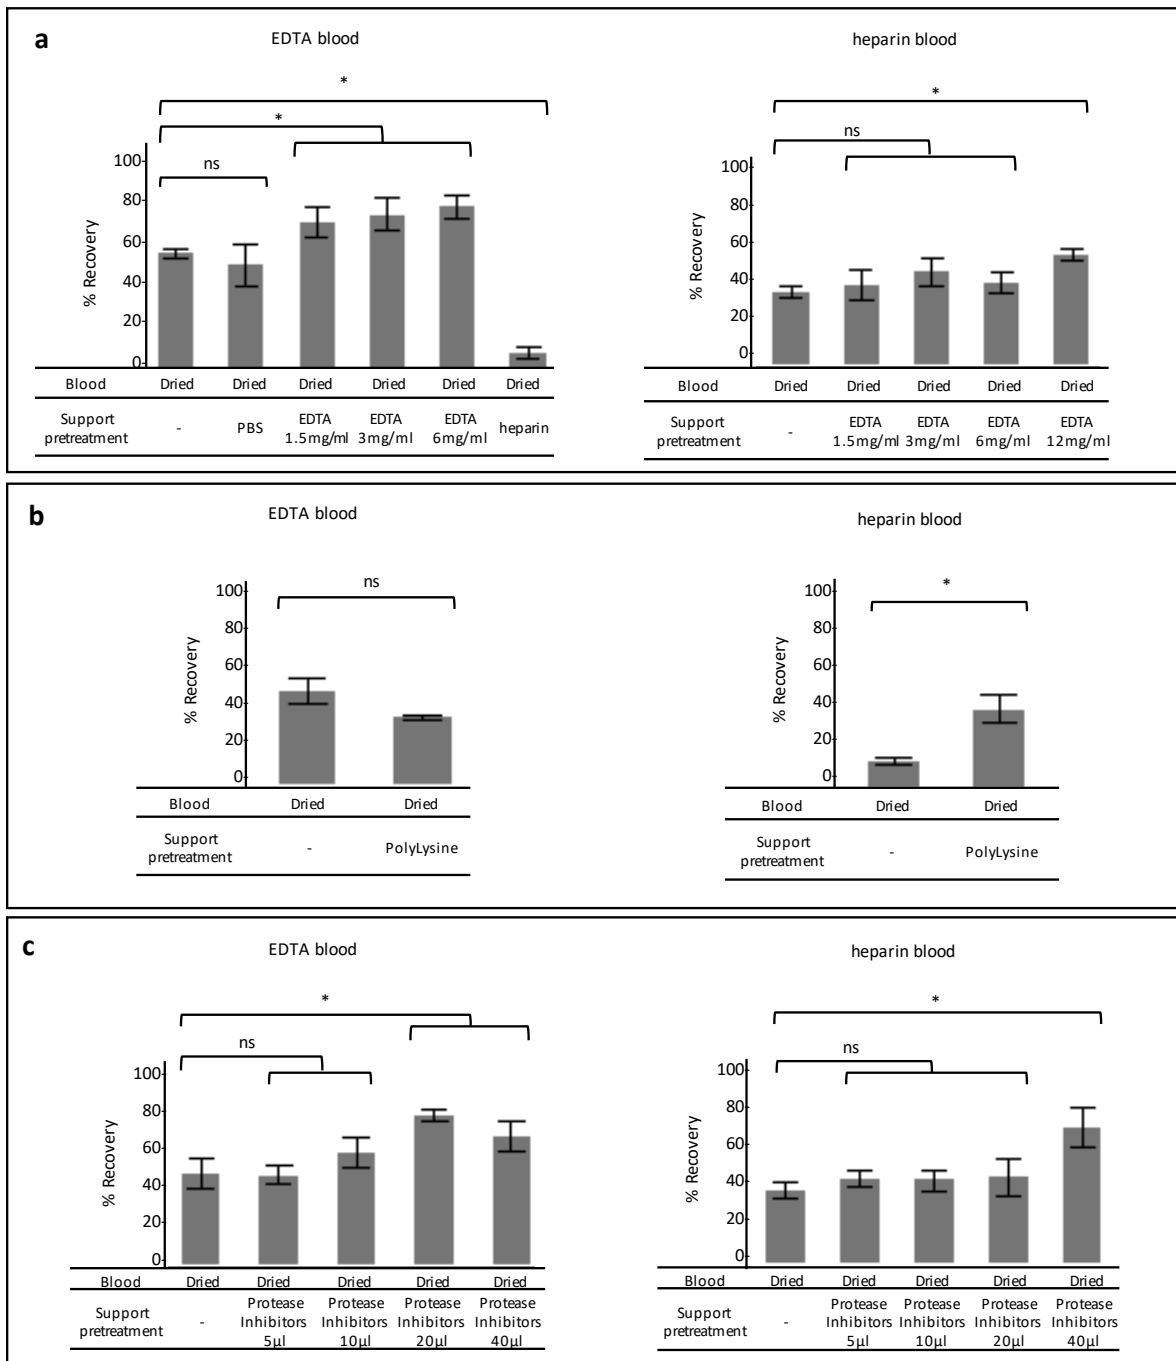

**Supplementary Figure 3.** Solid support pretreatment effect on leucocyte recovery. Leucocyte recovery in three separate experiments: pretreated solid support with EDTA or heparin **(a)**, poly-L-lysine **(b)** or protease inhibitors **(c)**. Mean comparison with control (dried blood without solid support pretreatment) on Student's T test, ns: non-significant ( $p$  values  $> 0,05$ ); \*: significant ( $p$  values  $\leq 0,05$ ),  $n=3$  per condition. All data are presented as mean  $\pm$  standard deviation.

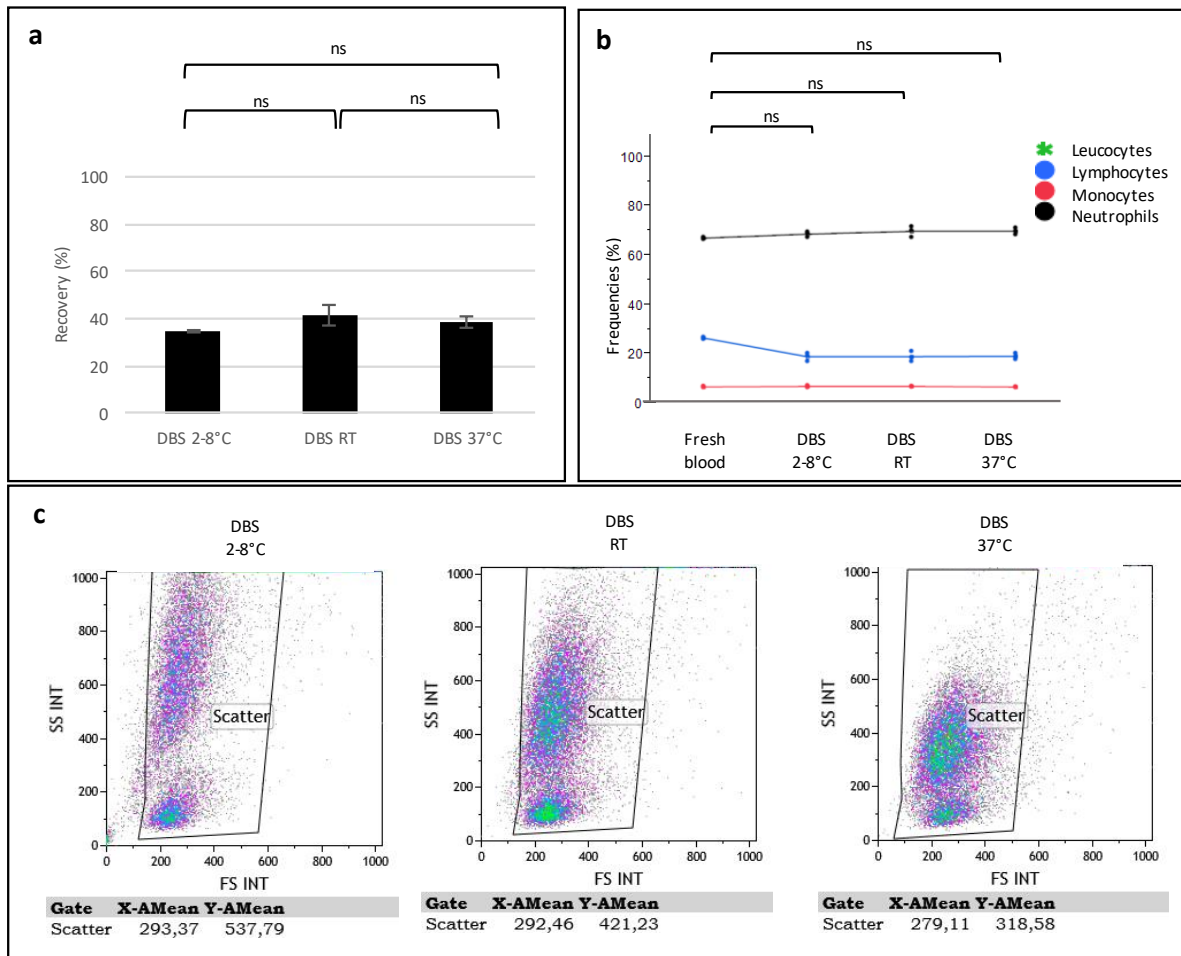

**Supplementary Figure 4.** Storage temperature effect on leucocyte recovery. **(a)** Leucocyte recovery from DBS stored at 2-8°C, RT and 37°C. Mean comparison with control (RT) on Tukey-Kramer HSD test; ns: non-significant (p values > 0,05); \*: significant (p values ≤ 0,05), n=3 per condition **(b)** Leucocyte sub-population proportions on DBS stored at 2-8°C , RT and 37°C. Mean comparison with control (fresh blood) on Dunnett's test; ns: non-significant (p values > 0,05); \*: significant (p values ≤ 0,05), n=3 per condition. **(c)** Cytometry dot plots (FSC: SS) on DBS stored at 2-8°C, RT and 37°. All data are presented as mean ± standard deviation.

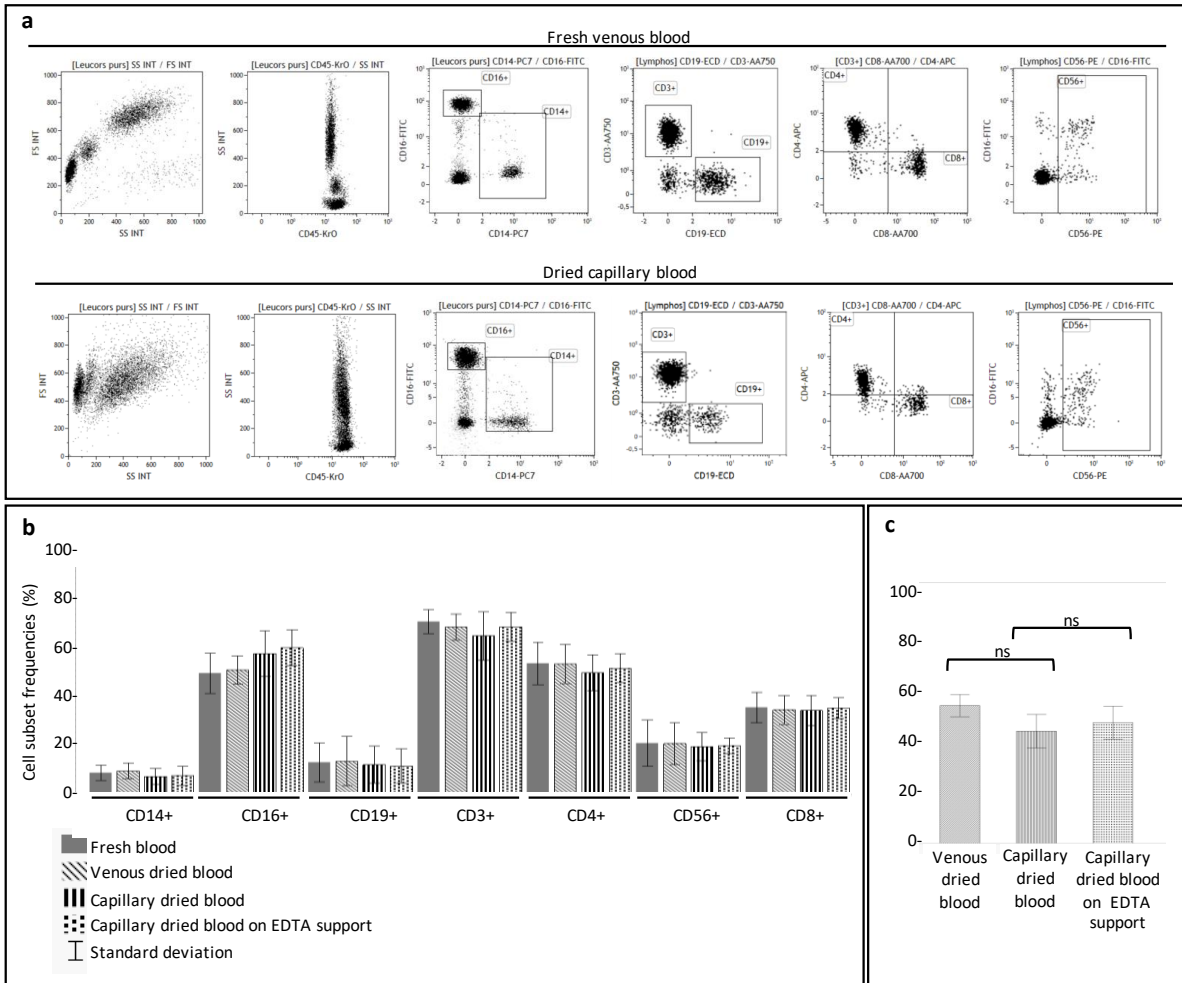

**Supplementary Figure 5.** Venous versus capillary dried blood comparison. Cell markers (**a**), corresponding subset frequencies (**b**), and leucocyte recovery (**c**) from fresh blood, dried venous blood, and fingersticks dried with or without EDTA solid support pretreatment. Comparison between the different conditions on Student's T test, ns: non-significant (p values > 0,05); \*: significant (p values ≤ 0,05), n=3 donors per condition, data are presented as mean ± standard deviation.

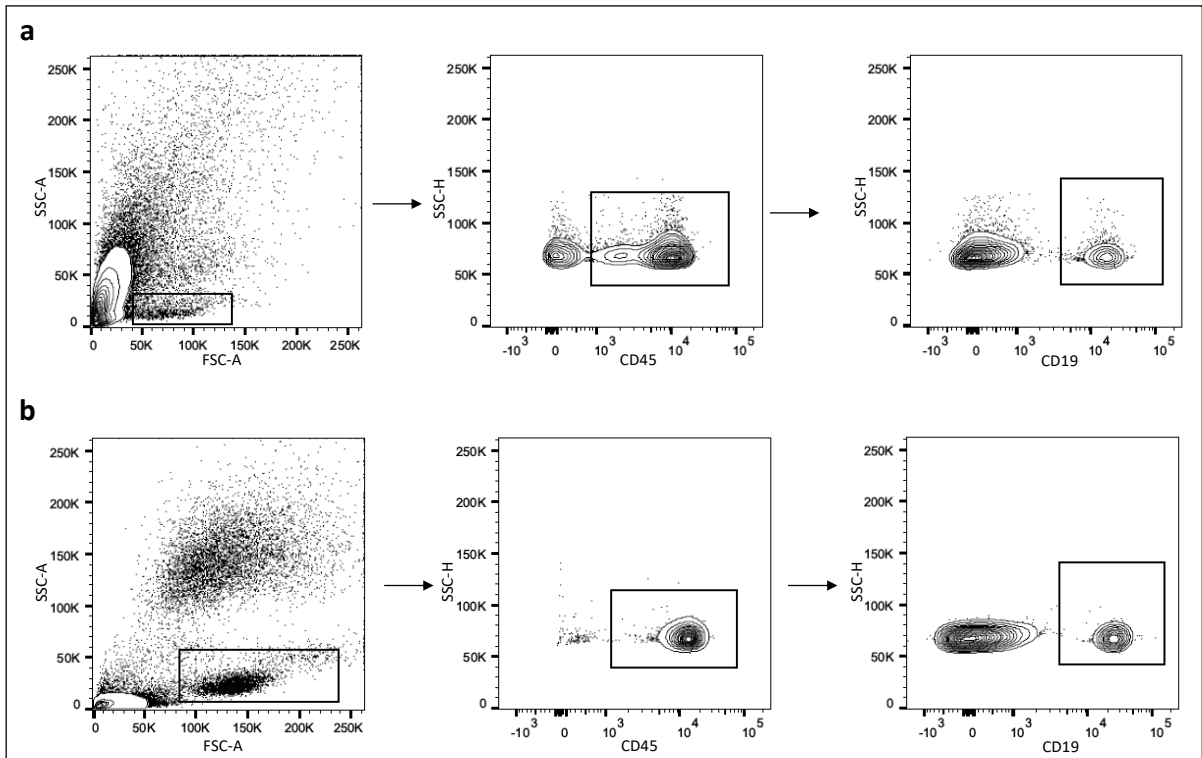

**Supplementary Figure 6.** Representative FACS profiles of cells collected from DBS (a) versus from fresh venous blood (b) CD45+CD19+ B cell populations isolated from donor C.

**Supplementary Table 1.** Subset frequencies in fresh and dried blood

|       | Donor 1 |       | Donor 2 |       | Donor 3 |       | Donor 4 |       | Donor 5  |       |
|-------|---------|-------|---------|-------|---------|-------|---------|-------|----------|-------|
|       | Fresh   | Dried | Fresh   | Dried | Fresh   | Dried | Fresh   | Dried | Fresh    | Dried |
| CD14+ | 9,99    | 7,31  | 7,36    | 5     | 8,14    | 6,73  | 6,16    | 4,41  | 4,24     | 3,28  |
| CD16+ | 47,2    | 68,28 | 63,41   | 80,32 | 51,35   | 67,34 | 66,15   | 76,49 | 73,26    | 80,06 |
| CD19+ | 9,25    | 9,24  | 13,1    | 12,99 | 5,76    | 5     | 12,8    | 12,19 | 11,67    | 11,05 |
| CD3+  | 83,79   | 80,7  | 69,63   | 59,53 | 52,71   | 47,93 | 66,03   | 58,24 | 72,47    | 68,79 |
| CD4+  | 48,98   | 47,79 | 60,77   | 59,97 | 48      | 43,92 | 49,15   | 50,3  | 62,78    | 60,98 |
| CD8+  | 44,76   | 43,03 | 34,14   | 32,18 | 45,67   | 47,78 | 39,83   | 38,2  | 33,88    | 33,41 |
| CD56+ | 11,23   | 11,98 | 13,43   | 13,15 | 40,94   | 42,27 | 31,28   | 29,68 | 13,36    | 13,25 |
|       | Donor 6 |       | Donor 7 |       | Donor 8 |       | Donor 9 |       | Donor 10 |       |
|       | Fresh   | Dried | Fresh   | Dried | Fresh   | Dried | Fresh   | Dried | Fresh    | Dried |
| CD14+ | 9,44    | 3,88  | 6,35    | 5,41  | 5,23    | 4,07  | 10,47   | 8,07  | 6,1      | 5,04  |
| CD16+ | 53,45   | 80,45 | 59,29   | 73,04 | 77,17   | 86,37 | 71,6    | 79,23 | 79,03    | 83,18 |
| CD19+ | 11,15   | 12,03 | 19,99   | 23,46 | 7,93    | 9,96  | 10,06   | 10,88 | 8,26     | 9,23  |
| CD3+  | 79,75   | 74,77 | 63,19   | 55,18 | 83,42   | 73,8  | 82,91   | 79,43 | 68,38    | 61,94 |
| CD4+  | 61,47   | 60    | 75,29   | 73,92 | 60,73   | 63,22 | 62,18   | 62,32 | 62,3     | 60,32 |
| CD8+  | 28,99   | 27,03 | 21,2    | 17,89 | 35,39   | 27,9  | 31,12   | 31,11 | 25,73    | 25,81 |
| CD56+ | 17,26   | 15,89 | 14,79   | 17,74 | 7,58    | 9,83  | 15,46   | 12,86 | 22,07    | 21,41 |

**Supplementary Table 2.** Gene-specific primers and TaqMan assays

| Gene name      | External Forward primer (5'→3') | External Reverse primer (5'→3') | TaqMan assay  |
|----------------|---------------------------------|---------------------------------|---------------|
| <i>B2M</i>     | ACACTGAATTCACCCCACT             | ACATGGAGACAGCACTCAAAGT          | Hs00984230_m1 |
| <i>CD79B</i>   | ATCATGATCCAGACGCTGCT            | TGGGTGCTCACCTACAGACC            | Hs01058826_g1 |
| <i>CXCR5</i>   | GATCAATCAAACCCGGCGGT            | TTCCCTGCCTCAGTGTGTTTC           | Hs00540548_s1 |
| <i>GAPDH</i>   | CATGGGTGTGAACCATGAGA            | TTCAGCTCAGGGATGACCTT            | Hs02758991_g1 |
| <i>HLA-DOA</i> | GCGCCACTCCTCAGGCATT             | AAAGTCAGCACAGCGGGATG            | Hs01109372_g1 |
| <i>HLA-DRA</i> | CACTCCCGAGCTCTACTGAC            | CCAAATTCTCAAGCCGCCA             | Hs00219575_m1 |
| <i>IGLL5</i>   | CTGCTGCGCCAATGGTT               | CAGGCCACTGTCACAGCTC             | Hs04330879_u1 |
| <i>SELL</i>    | TTTGGGCAAGGACCTGAGAC            | GGTTCCATGATGTGCCAGGA            | Hs00174151_m1 |
| <i>TCF3</i>    | GCACTGGCCTCGATCTACTC            | CCTCGTCCAGGTGGTCTTCT            | Hs00413032_m1 |
